# Supplementary material
Source: MDPI journal article supplement (https://www.mdpi.com/1999-4907/15/3/552)
Supplement: s1 [file s1]

**Supplementary Information for**

**Improving the simulation accuracy of net ecosystem productivity of subtropical forests in  
China: Sensitivity analysis and parameter calibration based on the BIOME-BGC model**

Jiaqian Sun<sup>a,b,c</sup>, Fangjie Mao<sup>a,b,c</sup>, Huaqiang Du<sup>a,b,c</sup>, Xuejian Li<sup>a,b,c</sup>, Cenheng Xu<sup>a,b,c</sup>, Zhaodong Zheng<sup>a,b,c</sup>,  
Xianfeng Teng<sup>a,b,c</sup>, Fengfeng Ye<sup>a,b,c</sup>, Ningxin Yang<sup>a,b,c</sup> and Zihao Huang<sup>a,b,c</sup>

Corresponding author: Fangjie Mao ([maofj@zafu.edu.cn](mailto:maofj@zafu.edu.cn))

**This file includes:**

Supplementary Table S1-S2, and References

**Table S1** Photosynthesis-related parameters involved in sensitive analyses of the BIOME-BGC model.

| Symbol                                     | EBF                  | ENF                | BAMBOO             |
|--------------------------------------------|----------------------|--------------------|--------------------|
| Photosynthesis biophysics parameters       |                      |                    |                    |
| FLNR                                       | 0.06 Biome-BGC V4.2  | 0.075 Iteration    | 0.06 Iteration     |
| K <sub>o25</sub>                           | 248.0 [1]            | 248.0 [1]          | 248.0 [1]          |
| R <sub>act25</sub>                         | 3.6 [1]              | 3.6 [1]            | 3.6 [1]            |
| K <sub>c25</sub>                           | 404.0 [1]            | 404.0 [1]          | 404.0 [1]          |
| Q <sub>10kc</sub>                          | 2.1 [1]              | 2.1 [1]            | 2.1 [1]            |
| Q <sub>10ko</sub>                          | 1.2 [1]              | 1.2 [1]            | 1.2 [1]            |
| Q <sub>10Ract</sub>                        | 2.4 [1]              | 2.4 [1]            | 2.4 [1]            |
| Allocation of carbon parameters            |                      |                    |                    |
| FRC:LC                                     | 1 Biome-BGC V4.2     | 1 [2]              | 1 [2]              |
| LWC:TWC                                    | 0.1 Biome-BGC V4.2   | 0.1 [2]            | 0.1 [2]            |
| SC:LC                                      | 2.2 Biome-BGC V4.2   | 2.2 Biome-BGC V4.2 | 1.0 [2]            |
| CRS:SC                                     | 0.23 Biome-BGC V4.2  | 0.3 [2]            | 0.3 [2]            |
| CGP                                        | 0.5 Biome-BGC V4.2   | 0.5 Biome-BGC V4.2 | 0.5 Biome-BGC V4.2 |
| Canopy structure biophysics parameters     |                      |                    |                    |
| W <sub>int</sub>                           | 0.045 Biome-BGC V4.2 | 0.033 [3]          | 0.033 [3]          |
| SLA <sub>shd:sun</sub>                     | 2.0 Biome-BGC V4.2   | 2.0 [2]            | 2.0[2]             |
| k                                          | 0.5 Biome-BGC V4.2   | 0.58 [4]           | 0.9 Measured       |
| SLA                                        | 15 [2]               | 15 [2]             | 15 Measured        |
| LAI <sub>all:proj</sub>                    | 2.6 [2]              | 2.6 [2]            | 2.6 [2]            |
| Stomatal conductance biophysics parameters |                      |                    |                    |
| G <sub>smax</sub>                          | 0.003 Biome-BGC V4.2 | 0.0065 [5]         | 0.003 [2]          |
| G <sub>bl</sub>                            | 0.08 [2]             | 0.08 [2]           | 0.08 [2]           |
| LWP <sub>f</sub>                           | -2.3 [2]             | -2.3[2]            | -2.3 [2]           |
| LWP <sub>i</sub>                           | -0.6 [2]             | -0.6 [2]           | -0.6 [2]           |
| VPD <sub>f</sub>                           | 4100 [2]             | 4100 [2]           | 4100 [2]           |
| VPD <sub>i</sub>                           | 930 [2]              | 930 [2]            | 930 [2]            |
| G <sub>cut</sub>                           | 0.00001 [2]          | 0.00001[2]         | 0.00001[2]         |

**Table S2** Respiratory-related and other physio-ecological parameters involved in sensitivity analysis of BIOME-BGC model.

| Symbol                                          | EBF                  | ENF                  | BAMBOO               |
|-------------------------------------------------|----------------------|----------------------|----------------------|
| Heterotrophic respiration biophysics parameters |                      |                      |                      |
| C:N <sub>litter</sub>                           | 93.0 [2]             | 93.0[2]              | 93.0 [2]             |
| LWT                                             | 0.7 Biome-BGC V4.2   | 0.7 [6]              | 0.7 [2]              |
| LFG                                             | 0.2 Biome-BGC V4.2   | 0.3 Biome-BGC V4.2   | 0.3 Biome-BGC V4.2   |
| Maintenance respiration biophysics parameters   |                      |                      |                      |
| MR <sub>pern</sub>                              | 0.218 Biome-BGC V4.2 | 0.218 Biome-BGC V4.2 | 0.218 Biome-BGC V4.2 |
| C:N <sub>leaf</sub>                             | 42.0 Biome-BGC V4.2  | 42.0 [2]             | 41.73 [7]            |
| C:N <sub>fr</sub>                               | 42.0 Biome-BGC V4.2  | 42.0 [2]             | 42.0 [2]             |
| C:N <sub>dw</sub>                               | 729.0 [2]            | 729.0 [2]            | 729.0 [2]            |
| C:N <sub>lw</sub>                               | 50.0 [2]             | 50.0 [2]             | 50.0 [2]             |
| Vegetation chemical parameters                  |                      |                      |                      |
| T <sub>t</sub>                                  | 0.2 Biome-BGC V4.2   | 0.3 Biome-BGC V4.2   | 0.3 Biome-BGC V4.2   |
| L <sub>lab</sub>                                | 0.32 [8]             | 0.49 [8]             | 0.32 [9]             |
| L <sub>lig</sub>                                | 0.3 Biome-BGC V4.2   | 0.3 Biome-BGC V4.2   | 0.24 [9]             |
| FR <sub>lab</sub>                               | 0.3 Biome-BGC V4.2   | 0.34 Biome-BGC V4.2  | 0.3 [9]              |
| FR <sub>lig</sub>                               | 0.25 Biome-BGC V4.2  | 0.22 [10]            | 0.25 [9]             |
| DW <sub>lig</sub>                               | 0.24 Biome-BGC V4.2  | 0.24 Biome-BGC V4.2  | 0.24 [9]             |
| Management measure parameters                   |                      |                      |                      |
| P <sub>dsw</sub>                                | -                    | -                    | 0.1 Measured         |
| P <sub>obtr_total</sub>                         | -                    | -                    | 7 Measured           |
| SCR <sub>ages</sub>                             | -                    | -                    | 0 Measured           |
| Fer                                             | -                    | -                    | 0.023 [11]           |
| P <sub>dss</sub>                                | -                    | -                    | 0.5 Measured         |

## References

1. Woodrow, I. E.; Berry, J. A. Enzymatic Regulation of Photosynthetic CO<sub>2</sub> Fixation in C<sub>3</sub> Plants. *Annu. Rev. Plant Physiol. Plant Molec. Biol.* 1988, 39, 533-94.
2. White, M. A.; Thornton, P. E.; Running, S. W.; Nemani, R. R. Parameterization and Sensitivity Analysis of the BIOME-BGC Terrestrial Ecosystem Model: Net Primary Production Controls. *Earth Interact.* 2000, 4, 1-85.
3. Wu, Y.; Wang, X.; Ouyang, S.; Xu, K.; Hawkins, B. A.; Sun, O. J. A test of BIOME-BGC with dendrochronology for forests along the altitudinal gradient of Mt. Changbai in northeast China. *J. Plant Ecol.* 2016, 123, 439-52.
4. Zhou, C.-H.; Hao, Z.-Q.; He, H.-S.; Zhou, D.-H. Sensitivity of parameters in net primary productivity model of broadleaf-Korean pine mixed forest. *Chin. J. Appl. Ecol.* 2008, 19, 929-35.
5. Gao, Q.; Peng, S.; Zhao, P.; Zeng, X.; Cai, X.; Yu, M.; Shen, W.; Liu, Y. Explanation of vegetation succession in subtropical southern China based on ecophysiological characteristics of plant species. *Tree Physiol.* 2003, 23, 641-8.
6. Lu, W.; Fan, W. Y.; Tian, T. Parameter optimization of BEPS model based on the flux data of the temperate deciduous broad-leaved forest in Northeast China. *Chin. J. Appl. Ecol.* 2016, 27, 1353-8.
7. Liu, G.; Fan, S.; Su, W.; Xiao, F.; Huang, Y. Distribution Characteristics and Coupling Relationship of Organic Carbon and Total Nitrogen in *Phyllostachys pubescens* Forests with Different Operations and Management Modes. *J. Soil Water Conserv.* 2010, 24, 218-22.
8. Zhang, J.; Zhang, D.; Jian, Z.; Zhou, H.; Zhao, Y.; Wei, D. Litter decomposition and the degradation of recalcitrant components in *Pinus massoniana* plantations with various canopy densities. *J. For. Res.* 2019, 30, 1395-405.
9. Liu, Z.; Fei, B. Characteristics of Moso Bamboo with Chemical Pretreatment. IntechOpen: London, United Kingdom, 2013.
10. Holling, C. S.; Schindler, D. W.; Walker, B. H.; Roughgarden, J. Biodiversity in the functioning of ecosystems: an ecological synthesis; Cambridge University Press: Cambridge, England, Kingdom of England, 1995.
11. Jin, A. High profit management and participatory development of *phyllostachys pubescens* plantation in Zhejiang and Fujian mountainous areas. Ph.D. Dissertation, Nanjing Forestry University, Nanjing, 2004.
